# Supplementary material for: Alpha-Gal and Cross-Reactive Carbohydrate Determinants in the N-Glycans of Salivary Glands in the Lone Star Tick, Amblyomma americanum
Source: PubMed Central journal article supplement (PMC7157712; doi:10.3390/vaccines8010018), 2020-01-09

SFig. 1

N-glycan profiles in the lone star tick. Samples are for females and males of salivary glands (FSG and MSG) and carcasses (MCC and FCC) before the onset of feeding, 2 days after, and 5 days after feeding attachments (0dAF, 2dAF, and 5dAF). The percent total ion is shown with the heatmap with m indicating the mix of two different glycans. The m/z and deduced glycan structures are shown.

|          |                                                                                             |  | FSG-UF | FSG-2dF | FSG-5dF | MSG-UF | MSG-2dF | MSG-5dF | MCC-5dF | FCC-5dF |
|----------|---------------------------------------------------------------------------------------------|--|--------|---------|---------|--------|---------|---------|---------|---------|
| 733.3734 | (HexNAc) <sub>2</sub> (Deoxyhexose) <sub>1</sub>                                            |  | 0      | 0       | 0       | 0      | 0       | 0       | 0       | 6       |
| 763.3841 | (Hex) <sub>1</sub> (HexNAc) <sub>2</sub>                                                    |  | 0      | 0       | 0       | 0      | 0       | 0       | 0       | 5       |
| 937.4541 | (Hex) <sub>1</sub> (HexNAc) <sub>2</sub> (Deoxyhexose) <sub>1</sub>                         |  | 5      | 3.04    | 0       | 0      | 0.82    | 15.65   | 32      | 10      |
| 967.4837 | (Hex) <sub>2</sub> (HexNAc) <sub>2</sub>                                                    |  | 0      | 8.18    | 0       | 11     | 3.8     | 4.85    | 15      | 71      |
| 1111.563 | (Hex) <sub>1</sub> (HexNAc) <sub>2</sub> (Deoxyhexose) <sub>2</sub>                         |  | 0      | 0       | 0       | 0      | 0       | 0       | 11      | 0       |
| 1141.573 | (Hex) <sub>2</sub> (HexNAc) <sub>2</sub> (Deoxyhexose) <sub>1</sub>                         |  | 0      | 1.24    | 3.39    | 3      | 0.08    | 0.82    | 21      | 5       |
| 1171.584 | (Hex) <sub>3</sub> (HexNAc) <sub>2</sub>                                                    |  | 0      | 3.43    | 1.13    | 0      | 0.53    | 0.01    | 4       | 1       |
| 1315.662 | (Hex) <sub>2</sub> (HexNAc) <sub>2</sub> (Deoxyhexose) <sub>2</sub>                         |  | 0      | 0       | 0       | 0      | 0       | 0       | 5       | 0       |
| 1331.658 | (Hex) <sub>3</sub> (HexNAc) <sub>2</sub> (Pent) <sub>1</sub>                                |  | 0      | 0       | 0.03    | 0      | 0       | 0.07    | 0       | 0       |
| 1345.672 | (Hex) <sub>3</sub> (HexNAc) <sub>2</sub> (Deoxyhexose) <sub>1</sub>                         |  | 0      | 1.32    | 2.16    | 0      | 0.22    | 0.04    | 7       | 0       |
| 1375.684 | (Hex) <sub>4</sub> (HexNAc) <sub>2</sub>                                                    |  | 0      | 0.18    | 0.03    | 0      | 0.01    | 0       | 0       | 0       |
| 1386.7   | (Hex) <sub>2</sub> (HexNAc) <sub>3</sub> (Deoxyhexose) <sub>1</sub>                         |  | 0      | 0       | 0.01    | 0      | 0       | 0       | 0       | 0       |
| 1519.762 | (Hex) <sub>3</sub> (HexNAc) <sub>2</sub> (Deoxyhexose) <sub>2</sub>                         |  | 0      | 0       | 0       | 0      | 0       | 0       | 1       | 0       |
| 1549.772 | (Hex) <sub>4</sub> (HexNAc) <sub>2</sub> (Deoxyhexose) <sub>1</sub>                         |  | 0      | 0.02    | 0       | 15     | 0.01    | 0       | 1       | 2       |
| 1579.787 | (Hex) <sub>2</sub> + (Man) <sub>3</sub> (GlcNAc) <sub>2</sub>                               |  | 5      | 12.92   | 0.58    | 20     | 19.36   | 12.01   | 0       | 0       |
| 1590.8   | (HexNAc) <sub>1</sub> (Deoxyhexose) <sub>1</sub> + (Man) <sub>3</sub> (GlcNAc) <sub>2</sub> |  | 0      | 0.23    | 1.13    | 0      | 0.01    | 0.94    | 0       | 0       |

|          |                                                                                                                |  |    |       |       |    |       |       |   |   |
|----------|----------------------------------------------------------------------------------------------------------------|--|----|-------|-------|----|-------|-------|---|---|
| 1661.836 | (HexNAc) <sub>2</sub> + (Man) <sub>3</sub> (GlcNAc) <sub>2</sub>                                               |  | 0  | 0     | 2.64  | 0  | 0     | 0     | 0 | 0 |
| 1753.872 | (Hex) <sub>2</sub> (Deoxyhexose) <sub>1</sub> + (Man) <sub>3</sub> (GlcNAc) <sub>2</sub>                       |  | 0  | 6.15  | 0     | 2  | 7.13  | 0     | 0 | 0 |
| 1783.882 | (Hex) <sub>3</sub> + (Man) <sub>3</sub> (GlcNAc) <sub>2</sub>                                                  |  | 17 | 12.21 | 1.46  | 14 | 13.66 | 7.86  | 0 | 0 |
| 1794.899 | (Hex) <sub>1</sub> (HexNAc) <sub>1</sub> (Deoxyhexose) <sub>1</sub> + (Man) <sub>3</sub> (GlcNAc) <sub>2</sub> |  | 0  | 0     | 0.72  | 0  | 0.61  | 0     | 0 | 0 |
| 1824.909 | (Hex) <sub>2</sub> (HexNAc) <sub>1</sub> + (Man) <sub>3</sub> (GlcNAc) <sub>2</sub>                            |  | 0  | 0     | 0     | 0  | 0     | 0.03m | 0 | 0 |
| 1835.925 | (HexNAc) <sub>2</sub> (Deoxyhexose) <sub>1</sub> + (Man) <sub>3</sub> (GlcNAc) <sub>2</sub>                    |  | 0  | 0     | 3.36  | 0  | 0     | 0.79  | 1 | 0 |
| 1865.936 | (Hex) <sub>1</sub> (HexNAc) <sub>2</sub> + (Man) <sub>3</sub> (GlcNAc) <sub>2</sub>                            |  | 0  | 0     | 1.39  | 0  | 0     | 0     | 0 | 0 |
| 1984.983 | (Hex) <sub>2</sub> (HexNAc) <sub>1</sub> (Pent) <sub>1</sub> + (Man) <sub>3</sub> (GlcNAc) <sub>2</sub>        |  | 0  | 0     | 0     | 0  | 0     | 1.06m | 0 | 0 |
| 1987.982 | (Hex) <sub>4</sub> + (Man) <sub>3</sub> (GlcNAc) <sub>2</sub>                                                  |  | 15 | 7.35  | 0.69  | 9  | 8.41  | 3.16  | 0 | 0 |
| 1999.006 | (Hex) <sub>2</sub> (HexNAc) <sub>1</sub> (Deoxyhexose) <sub>1</sub> + (Man) <sub>3</sub> (GlcNAc) <sub>2</sub> |  | 0  | 0.75m | 1.13m | 0  | 0     | 0     | 0 | 0 |
| 2029.01  | (Hex) <sub>3</sub> (HexNAc) <sub>1</sub> + (Man) <sub>3</sub> (GlcNAc) <sub>2</sub>                            |  | 0  | 0     | 0.04m | 0  | 0     | 0     | 0 | 0 |
| 2040.02  | (Hex) <sub>1</sub> (HexNAc) <sub>2</sub> (Deoxyhexose) <sub>1</sub> + (Man) <sub>3</sub> (GlcNAc) <sub>2</sub> |  | 2  | 0     | 3.86  | 0  | 0.53  | 7.11  | 0 | 0 |
| 2067.037 | (HexNAc) <sub>3</sub> (Pent) <sub>1</sub> + (Man) <sub>3</sub> (GlcNAc) <sub>2</sub>                           |  | 8  | 0     | 3.33  | 0  | 0     | 12.67 | 0 | 0 |
| 2070.036 | (Hex) <sub>2</sub> (HexNAc) <sub>2</sub> + (Man) <sub>3</sub> (GlcNAc) <sub>2</sub>                            |  | 0  | 0     | 1.33m | 1  | 0     | 0     | 0 | 0 |
| 2081.051 | (HexNAc) <sub>3</sub> (Deoxyhexose) <sub>1</sub> + (Man) <sub>3</sub> (GlcNAc) <sub>2</sub>                    |  | 2  | 6.58  | 38.82 | 1  | 5.39  | 12.65 | 1 | 0 |
| 2111.067 | (Hex) <sub>1</sub> (HexNAc) <sub>3</sub> + (Man) <sub>3</sub> (GlcNAc) <sub>2</sub>                            |  | 0  | 0     | 2.92  | 0  | 0.97  | 0     | 0 | 0 |
| 2192.083 | (Hex) <sub>5</sub> + (Man) <sub>3</sub> (GlcNAc) <sub>2</sub>                                                  |  | 6  | 4.56  | 0.32  | 4  | 4.38  | 2.4   | 0 | 0 |
| 2203.09  | (Hex) <sub>3</sub> (HexNAc) <sub>1</sub> (Deoxyhexose) <sub>1</sub> + (Man) <sub>3</sub> (GlcNAc) <sub>2</sub> |  | 0  | 0.01  | 0.39m | 0  | 0.01m | 0.25m | 0 | 0 |
| 2230.107 | (Hex) <sub>2</sub> (HexNAc) <sub>2</sub> (Pent) <sub>1</sub> + (Man) <sub>3</sub> (GlcNAc) <sub>2</sub>        |  | 0  | 0     | 0.34m | 0  | 0     | 0     | 0 | 0 |
| 2233.11  | (Hex) <sub>4</sub> (HexNAc) <sub>1</sub> + (Man) <sub>3</sub> (GlcNAc) <sub>2</sub>                            |  | 0  | 0.01  | 0.04  | 0  | 0.01  | 0.04  | 0 | 0 |

|          |                                                                                                                |  |    |       |       |   |       |       |   |   |
|----------|----------------------------------------------------------------------------------------------------------------|--|----|-------|-------|---|-------|-------|---|---|
| 2244.119 | Hex <sub>2</sub> (HexNAc) <sub>2</sub> (Deoxyhexose) <sub>1</sub> + (Man) <sub>3</sub> (GlcNAc) <sub>2</sub>   |  | 7  | 2.15m | 2.87m | 2 | 3.09  | 4.08m | 0 | 0 |
| 2271.135 | (Hex) <sub>1</sub> (HexNAc) <sub>3</sub> (Pent) <sub>1</sub> + (Man) <sub>3</sub> (GlcNAc) <sub>2</sub>        |  | 0  | 0     | 1.33  | 0 | 0     | 0     | 0 | 0 |
| 2285.151 | (Hex) <sub>1</sub> (HexNAc) <sub>1</sub> (Deoxyhexose) <sub>1</sub> + (Man) <sub>3</sub> (GlcNAc) <sub>2</sub> |  | 18 | 6.65  | 14.09 | 9 | 5.01  | 2.67  | 0 | 0 |
| 2315.162 | (Hex) <sub>2</sub> (HexNAc) <sub>3</sub> + (Man) <sub>3</sub> (GlcNAc) <sub>2</sub>                            |  | 0  | 0     | 0.75m | 0 | 0.55  | 0     | 0 | 0 |
| 2326.178 | (HexNAc) <sub>4</sub> (Deoxyhexose) <sub>1</sub> + (Man) <sub>3</sub> (GlcNAc) <sub>2</sub>                    |  | 0  | 0     | 0.69  | 0 | 0     | 0     | 0 | 0 |
| 2396.183 | (Hex) <sub>6</sub> + (Man) <sub>3</sub> (GlcNAc) <sub>2</sub>                                                  |  | 2  | 5.32  | 0.31  | 2 | 4.75  | 3.07  | 0 | 0 |
| 2448.227 | (Hex) <sub>3</sub> (HexNAc) <sub>2</sub> (Deoxyhexose) <sub>1</sub> + (Man) <sub>3</sub> (GlcNAc) <sub>2</sub> |  | 0  | 0     | 0.51  | 0 | 0.01  | 1.74  | 0 | 0 |
| 2448.222 | (Hex) <sub>3</sub> (HexNAc) <sub>2</sub> (Deoxyhexose) <sub>1</sub> + (Man) <sub>3</sub> (GlcNAc) <sub>2</sub> |  | 0  | 0     | 0     | 1 | 0     | 0     | 0 | 0 |
| 2475.24  | (Hex) <sub>2</sub> (HexNAc) <sub>3</sub> (Pent) <sub>1</sub> + (Man) <sub>3</sub> (GlcNAc) <sub>2</sub>        |  | 0  | 0.96m | 0.11  | 0 | 0     | 1.19  | 0 | 0 |
| 2478.24  | (Hex) <sub>4</sub> (HexNAc) <sub>2</sub> + (Man) <sub>3</sub> (GlcNAc) <sub>2</sub>                            |  | 0  | 0.09  | 0.26  | 0 | 0     | 0     | 0 | 0 |
| 2489.252 | (Hex) <sub>2</sub> (HexNAc) <sub>3</sub> (Deoxyhexose) <sub>1</sub> + (Man) <sub>3</sub> (GlcNAc) <sub>2</sub> |  | 13 | 14.29 | 2.82m | 6 | 14.76 | 1.34m | 0 | 0 |
| 2652.322 | (Hex) <sub>4</sub> (HexNAc) <sub>2</sub> (Deoxyhexose) <sub>1</sub> + (Man) <sub>3</sub> (GlcNAc) <sub>2</sub> |  | 0  | 0.01  | 1.59  | 0 | 0.01  | 1.41  | 0 | 0 |
| 2693.352 | (Hex) <sub>3</sub> (HexNAc) <sub>3</sub> (Deoxyhexose) <sub>1</sub> + (Man) <sub>3</sub> (GlcNAc) <sub>2</sub> |  | 0  | 0.9   | 0.61m | 0 | 1.77  | 0.64  | 0 | 0 |
| 2883.436 | (Hex) <sub>4</sub> (HexNAc) <sub>3</sub> (Pent) <sub>1</sub> + (Man) <sub>3</sub> (GlcNAc) <sub>2</sub>        |  | 0  | 0     | 0     | 0 | 0     | 0.69  | 0 | 0 |
| 2897.451 | (Hex) <sub>4</sub> (HexNAc) <sub>3</sub> (Deoxyhexose) <sub>1</sub> + (Man) <sub>3</sub> (GlcNAc) <sub>2</sub> |  | 0  | 0     | 0     | 0 | 0     | 0.85  | 0 | 0 |
| 2897.451 | (Hex) <sub>4</sub> (HexNAc) <sub>3</sub> (Deoxyhexose) <sub>1</sub> + (Man) <sub>3</sub> (GlcNAc) <sub>2</sub> |  | 0  | 1.49  | 2.81  | 0 | 0.6   | 0     | 0 | 0 |
| 2938.478 | (Hex) <sub>3</sub> (HexNAc) <sub>4</sub> (Deoxyhexose) <sub>1</sub> + (Man) <sub>3</sub> (GlcNAc) <sub>2</sub> |  | 0  | 0     | 0     | 0 | 0.34  | 0     | 0 | 0 |
| 3142.578 | (Hex) <sub>4</sub> (HexNAc) <sub>4</sub> (Deoxyhexose) <sub>1</sub> + (Man) <sub>3</sub> (GlcNAc) <sub>2</sub> |  | 0  | 0     | 0     | 0 | 0.08  | 0     | 0 | 0 |
| 3602.783 | (Hex) <sub>3</sub> (HexNAc) <sub>3</sub> (NeuAc) <sub>3</sub> + (Man) <sub>3</sub> (GlcNAc) <sub>2</sub>       |  | 0  | 0     | 0     | 0 | 0.16  | 0     | 0 | 0 |
| 3604.799 | (Hex) <sub>4</sub> (HexNAc) <sub>3</sub> (NeuGc) <sub>1</sub> + (Man) <sub>3</sub> (GlcNAc) <sub>2</sub>       |  | 0  | 0     | 0     | 0 | 0.78  | 0     | 0 | 0 |

SFig.2

Supplementary data 2. Mass spectrometry spectra for the salivary glands of female fed for two days (F\_SG\_2dAF).

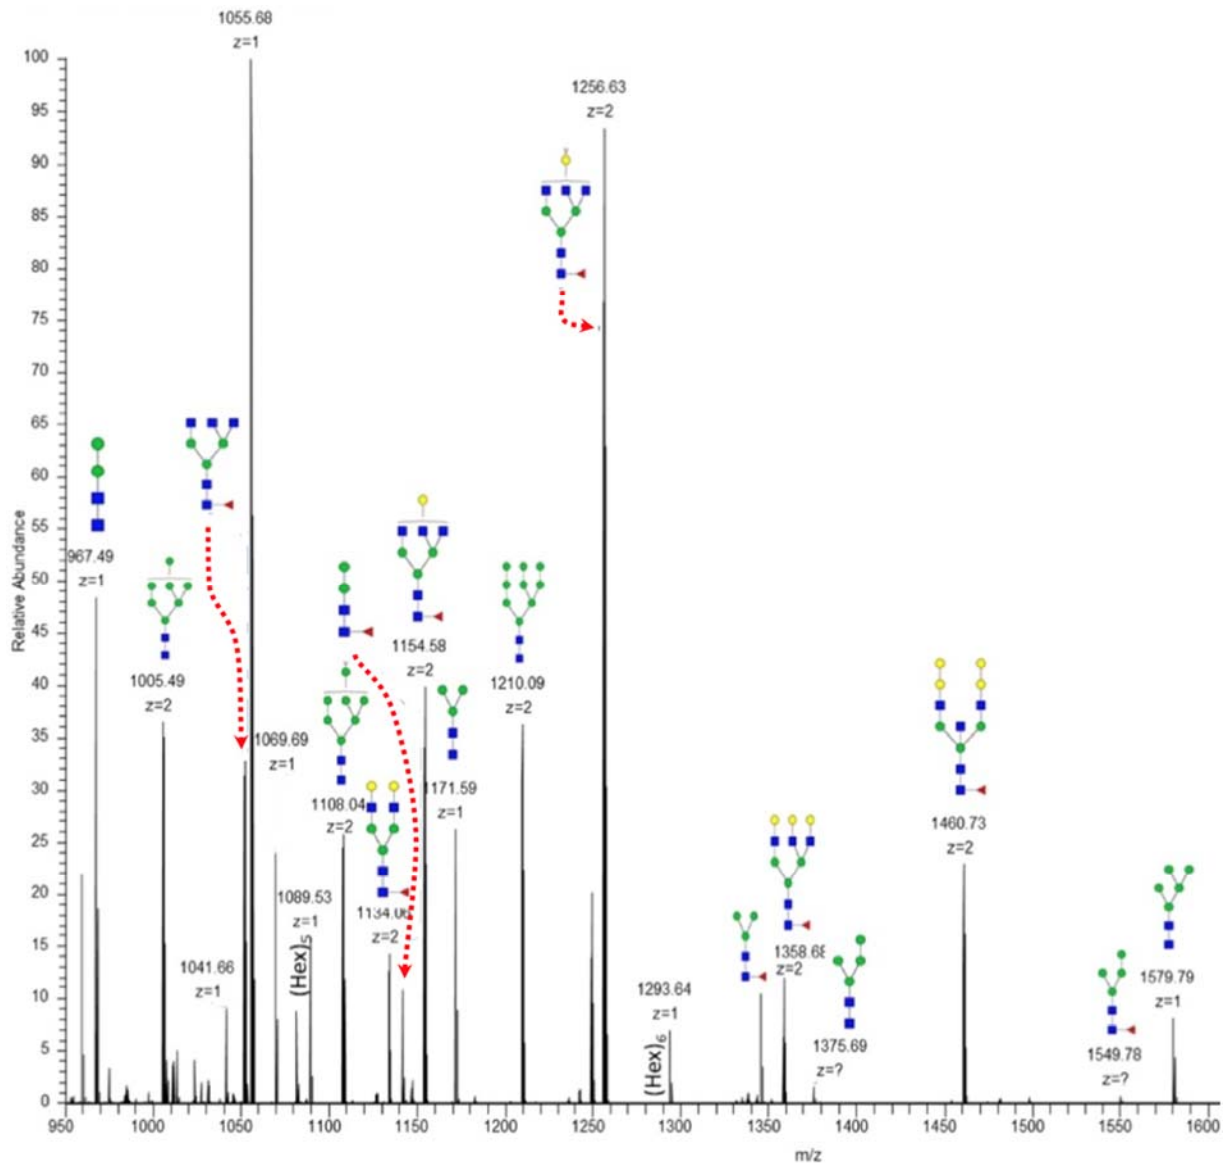

SFig.3

Supplementary data 3. Mass spectrometry spectra for the salivary glands of female fed for five days (F\_SG\_5dAF).

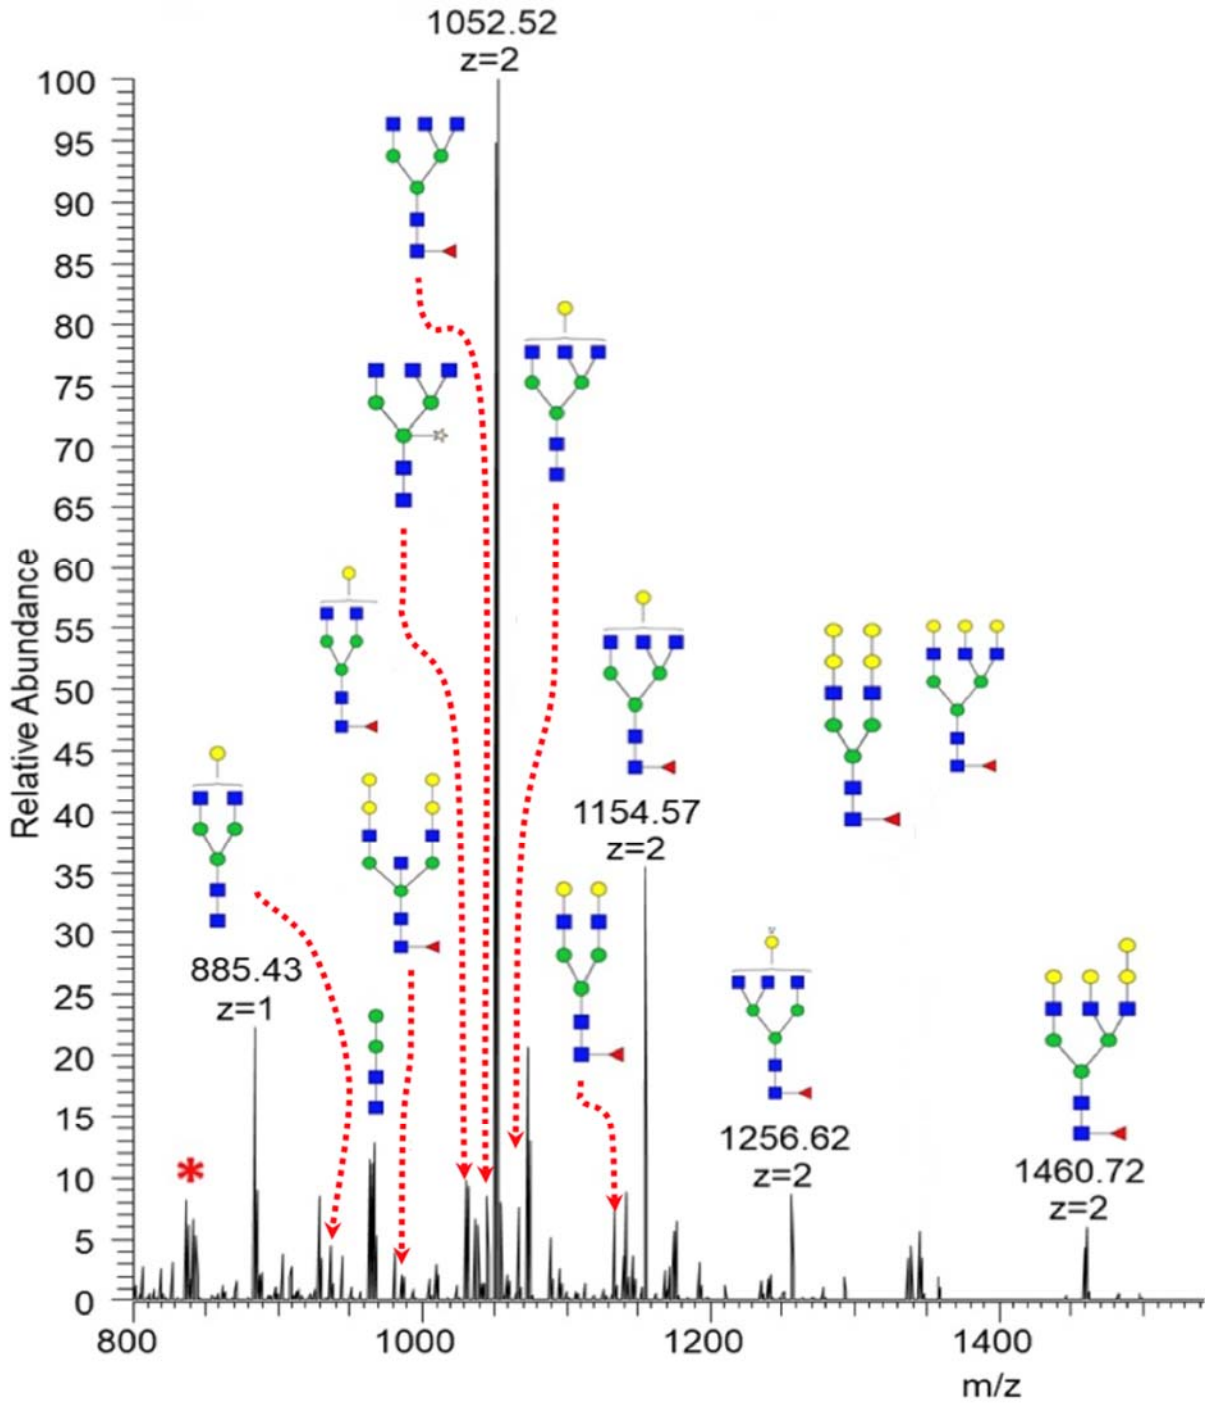

SFig.4

Supplementary data 4. MS/MS spectra of a Xylose-containing glycoform found in female salivary gland after 5 day feeding (F\_SG\_5dAF).

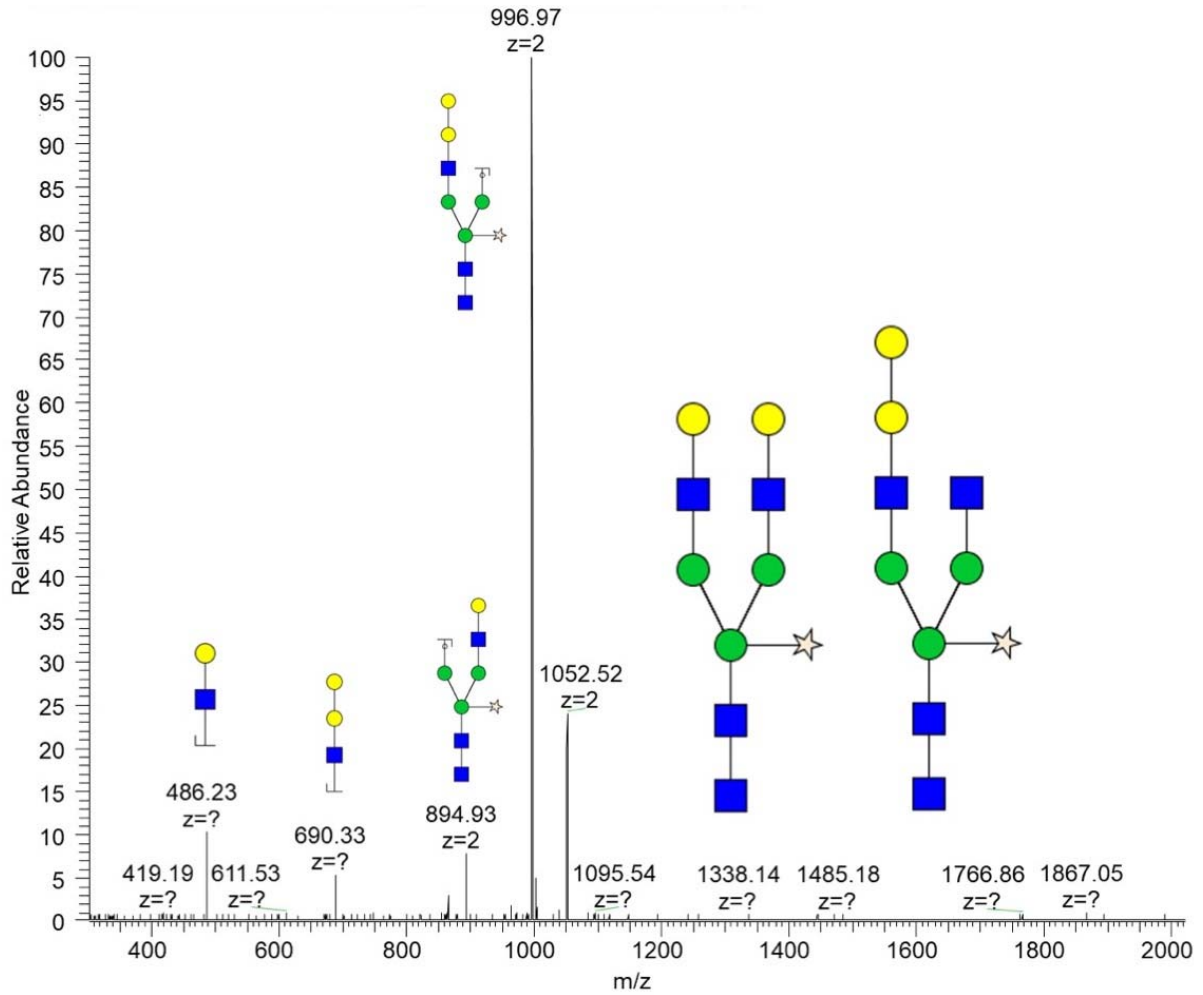



SFig.5

Supplementary data 5. MS/MS spectra of a mono- and di- fucose (m/z 1345) found in female carcass after 5 day feeding. Note that the decay pattern supports the 1,3 fucose paucimannose.

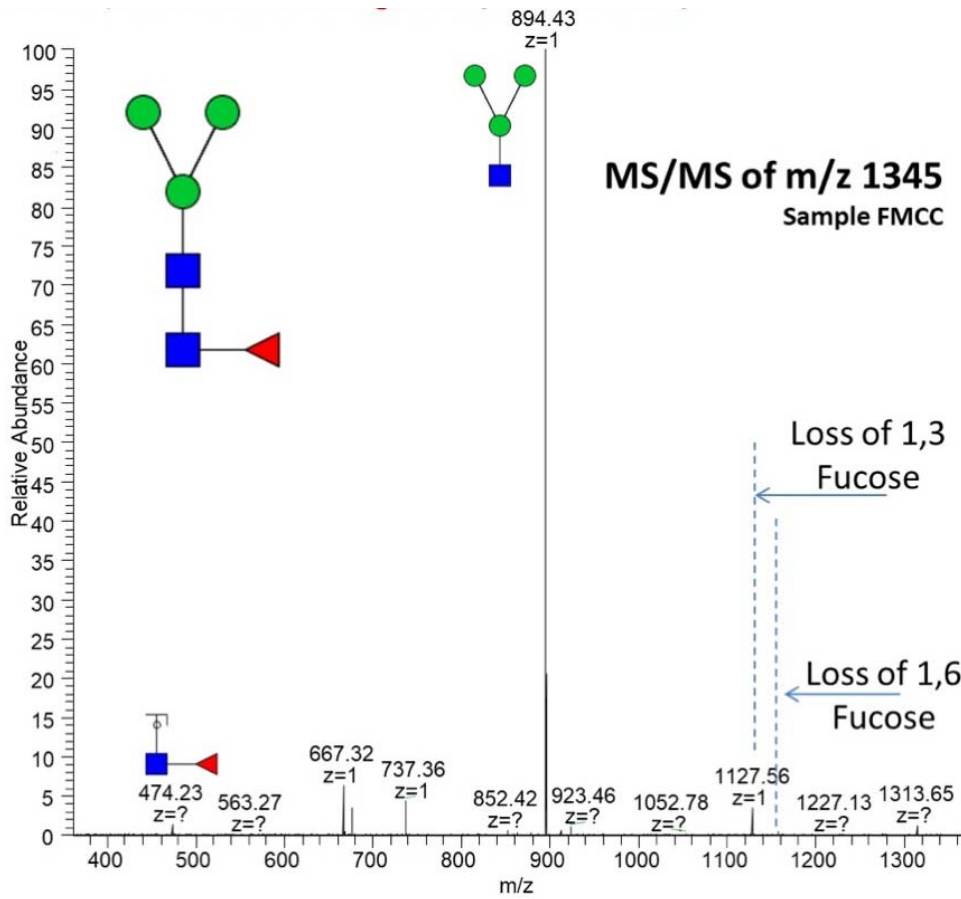

Supplement: vaccines-08-00018-s001.pdf [file vaccines-08-00018-s001.pdf]
